# Supplementary material for: A Dual-Plasmid-Based CRISPR/Cas9-Mediated Strategy Enables Targeted Editing of pH Regulatory Gene pacC in a Clinical Isolate of Trichophyton rubrum
Source: MDPI journal article supplement (doi:10.3390/jof8121241), 2022-11-24
Supplement: s1 [file s1]

# A dual-plasmid-based CRISPR/Cas9-mediated strategy enables targeted editing of pH regulatory gene *pacC* in a clinical isolate of *Trichophyton rubrum*

## Supplementary Figures and Tables

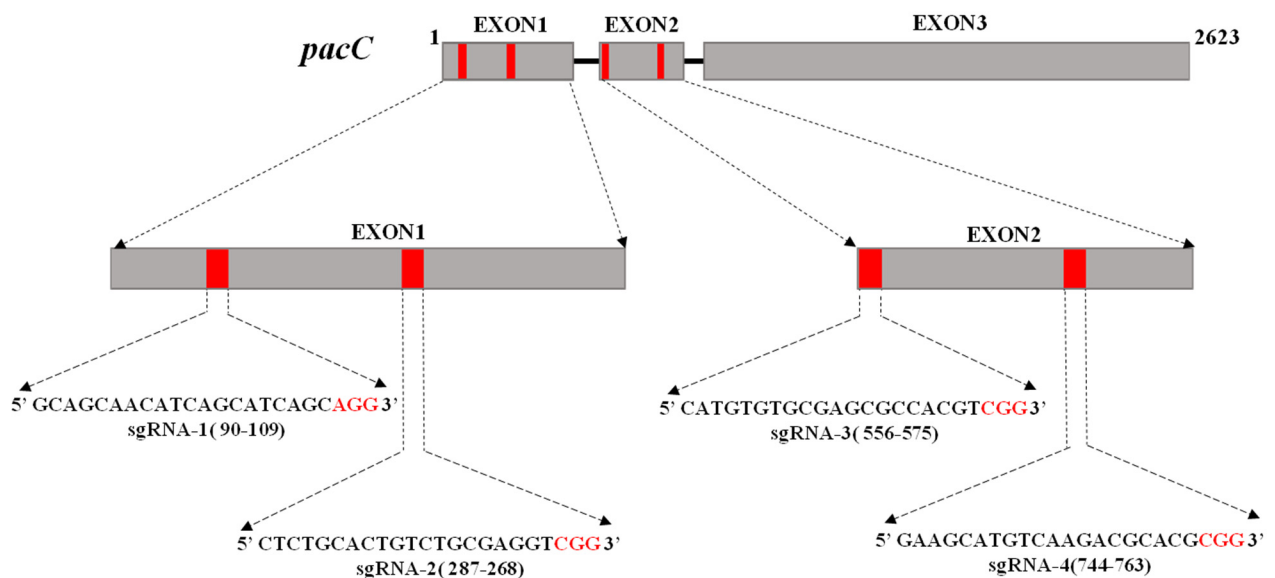

**Figure S1: Schematic of sgRNAs targeting *pacC*.** Four sets of oligonucleotides were designed; sgRNA-1 and sgRNA-2 complementary to regions in exon1 and sgRNA-3 and sgRNA-4 complementary to regions in exon2 of *pacC*. Location of the target sites in both exons are marked as red boxes. Sequence of the designed oligonucleotides and their nucleotide positions are indicated with the NGG sequence shown in red.

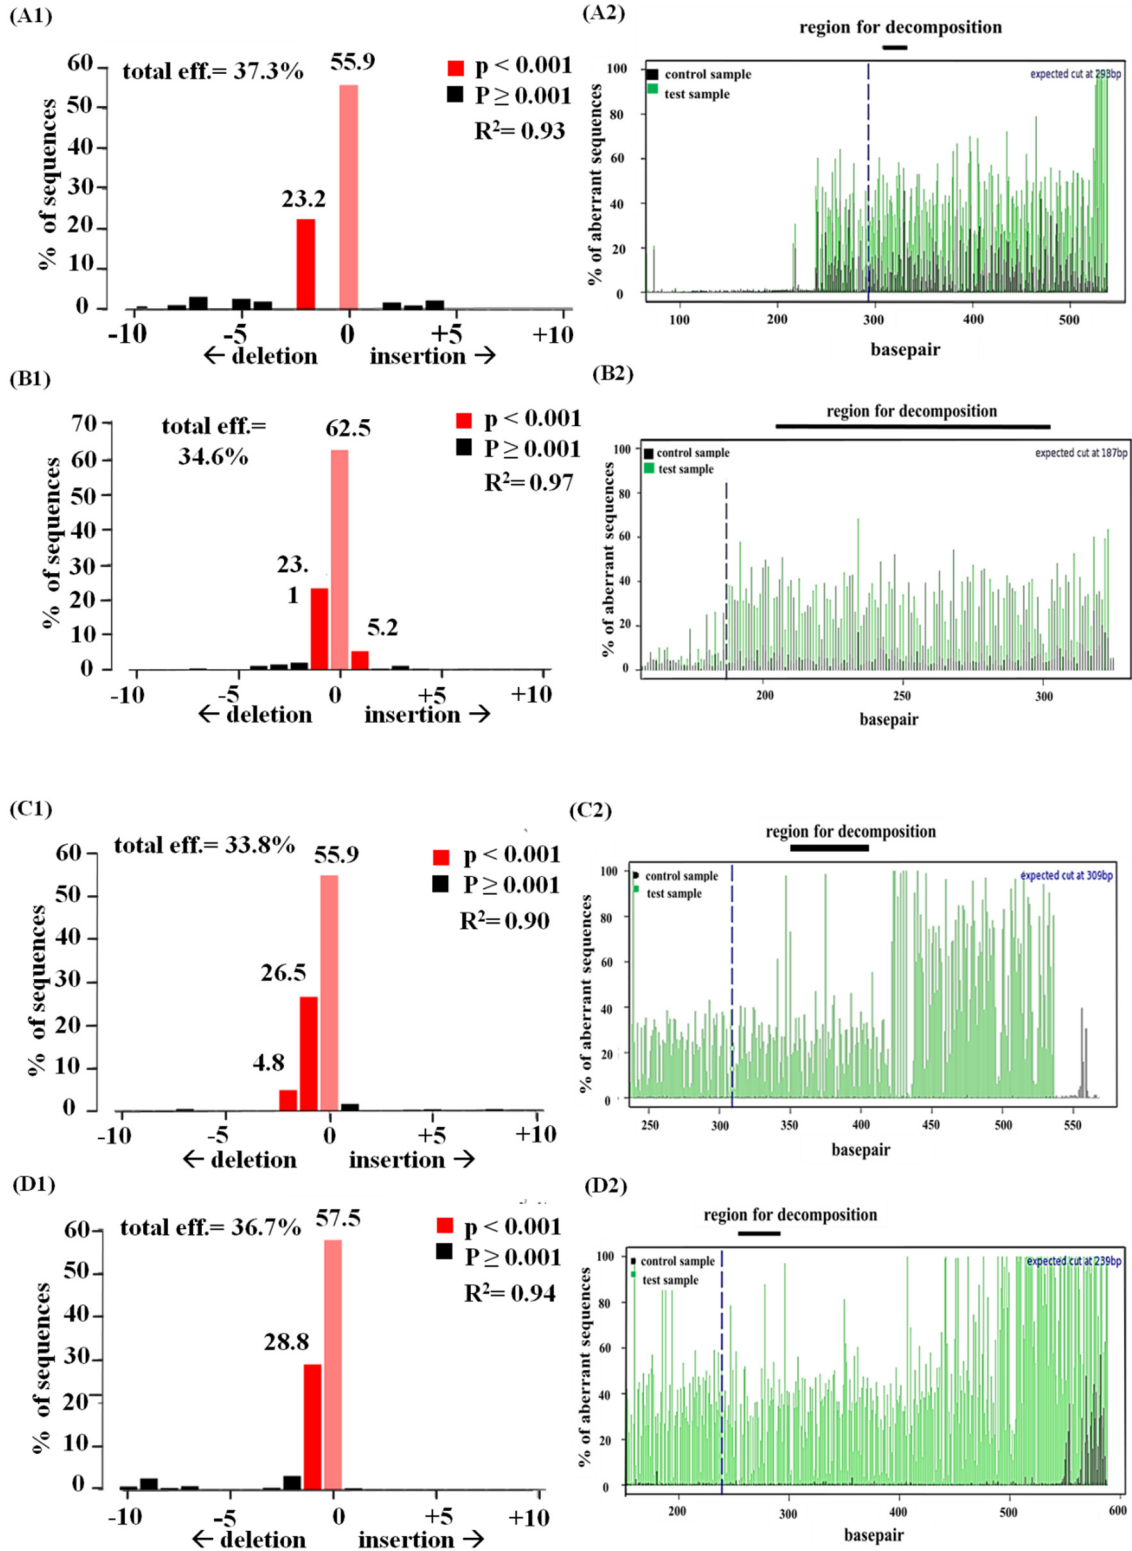

**Figure S2: Estimation of indels generated in *pacC*.** Indels generated in *pacC* were estimated by TIDE webtool. The estimated mutation efficiency for (A1) SG3\_col1, (B1) SG3\_col2, (C1) SG4\_col1 and (D1) SG4\_col2 are indicated in left panels and the respective regions of decomposition are in the accompanying right panels (A2- D2).

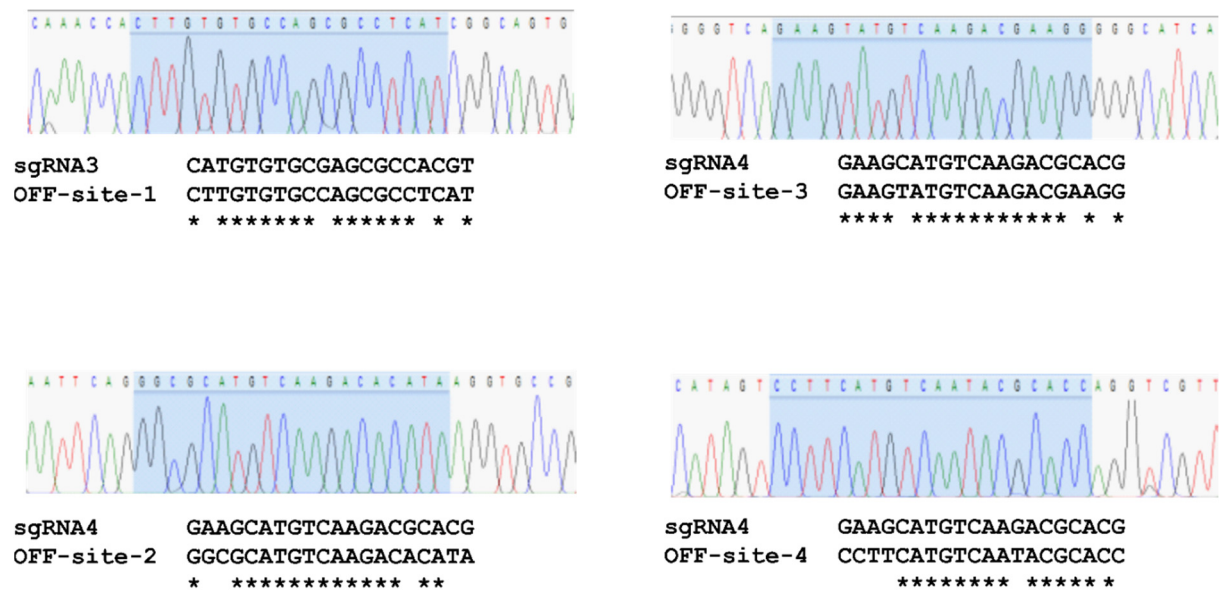

**Figure S3: Off-target analysis.** Predicted off-target sites were PCR amplified from the mutant colonies, followed by Sanger sequencing of these regions. No mutations were seen in these sites. Sequence alignment of the predicted off-target site with respective sgRNA is also shown in the figure.

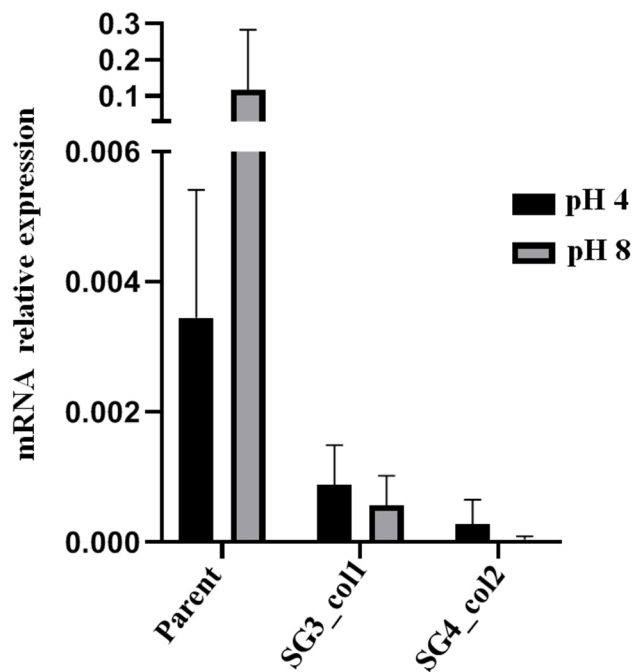

**Figure S4: Expression profile of *pacC*.** The expression of *pacC* indicates expression of *pacC* in the parent strain is much higher than SG3\_col1 and SG4\_col2 mutant strains. mRNA expression levels were determined by comparative  $2^{-Ct}$  method, normalizing expression to *-actin*. All results represent a mean of a triplicate experiment; error bars indicate standard deviation ( $\pm$ SD) of the triplicate experiments.

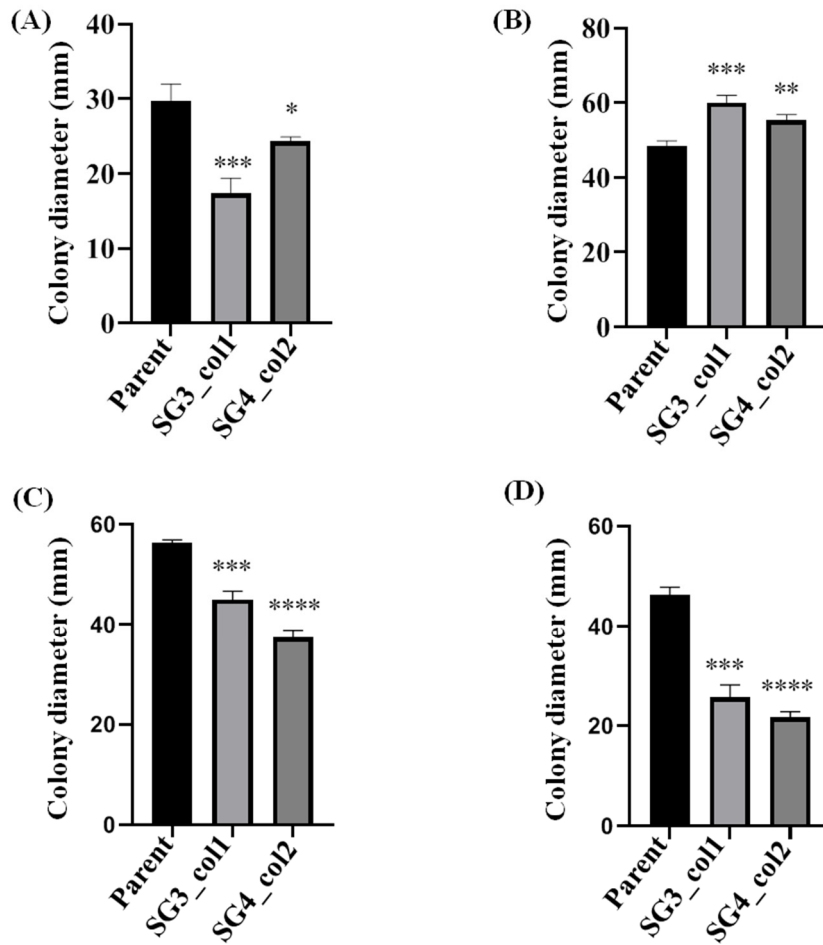

**Figure S5: Radial growth measurements of mutant strains under stress conditions.**

Average colony diameters (in mm) measured from three different plates of each mutant are plotted for growth on (A) buffered SDA plates at acidic pH (B) buffered SDA plates at alkaline pH, (C) SDA plates supplemented with 0.5 M NaCl and (D) SDA plates supplemented with 0.8 M NaCl along with one-way ANOVA analysis was conducted with a post hoc Tukey's test (\*p < 0.05, \*\*p < 0.01, \*\*\*p < 0.001 and \*\*\*\*p < 0.0001).

**Table S1: Strains, plasmids, oligonucleotides and primers used in this study.**

| <b>A. List of Strains</b>     |                                                                                                                        |                    |
|-------------------------------|------------------------------------------------------------------------------------------------------------------------|--------------------|
| <b>Strain name</b>            | <b>Description</b>                                                                                                     | <b>Source</b>      |
| <i>Escherichia coli</i> DH5α  | Bacterial strain for maintenance of plasmid constructs (Amp <sup>R</sup> )                                             | Laboratory stock   |
| <i>T. rubrum</i> IGIB-SBL-CI1 | <i>T. rubrum</i> parent strain used in the study (Clinical isolate, maintained at less than three passages in the lab) | Latka et al., 2015 |

| <b>B. List of Plasmids</b> |                                                                                                                                                 |                    |
|----------------------------|-------------------------------------------------------------------------------------------------------------------------------------------------|--------------------|
| <b>Plasmid name</b>        | <b>Description</b>                                                                                                                              | <b>Source</b>      |
| psgRNA5.0                  | Plasmid vector used to clone target-specific sgRNA fragments containing geneticin resistance gene ( <i>neo</i> <sup>R</sup> )                   | Zheng et al., 2019 |
| pcas9gfp                   | Plasmid vector for expression of Cas9 and eGFP fusion (Cas9GFP) <i>in vivo</i> with <i>amdS</i> marker                                          | Zheng et al., 2018 |
| pT7sgRNA                   | Plasmid vector for <i>in vitro</i> transcription of guide RNA products in order to carry out <i>in vitro</i> cleavage assay (Amp <sup>R</sup> ) | (Jao et al., 2013) |

| <b>C. List of Primers and oligonucleotides used in the study</b> |                                                      |                          |
|------------------------------------------------------------------|------------------------------------------------------|--------------------------|
| <b>Primer name</b>                                               | <b>Description</b>                                   | <b>Sequence</b>          |
| sgRNA1FP                                                         | Primer for cloning sgRNA-1 in psgRNA5.0 and pT7sgRNA | CACCGCAGCAACATCAGCATCAGC |
| sgRNA1RP                                                         | Primer for cloning sgRNA-1 in psgRNA5.0 and pT7sgRNA | AAACGCTGATGCTGATGTTGCTGC |
| sgRNA2FP                                                         | Primer for cloning sgRNA-2 in psgRNA5.0 and pT7sgRNA | CACCGTCTGCACTGTCTGCGAGGT |

|            |                                                                                     |                          |
|------------|-------------------------------------------------------------------------------------|--------------------------|
| sgRNA2RP   | Primer for cloning sgRNA-2 in psgRNA5.0 and pT7sgRNA                                | AAACACCTCGCAGACAGTGCAGAG |
| sgRNA3FP   | Primer for cloning sgRNA-3 in psgRNA5.0 and pT7sgRNA                                | CACCGATGTGTGCGAGCGCCACGT |
| sgRNA3RP   | Primer for cloning sgRNA-3 in psgRNA5.0 and pT7sgRNA                                | AAACACGTGGCGCTCGCACACATG |
| sgRNA4FP   | Primer for cloning sgRNA-4 in psgRNA5.0 and pT7sgRNA                                | CACCGAAGCATGTCAAGACGCACG |
| sgRNA4RP   | Primer for cloning sgRNA-4 in psgRNA5.0 and pT7sgRNA                                | AAACCGTGCGTCTTGACATGCTTC |
| PSGRNA5FP  | Forward primer for sequencing sgRNAs cloned in psgRNA5.0                            | GGTTGGAGATTCCAGACTCAGC   |
| PSGRNA5RP  | Reverse primer for sequencing sgRNAs cloned in psgRNA5.0                            | AAGCACCGACTCGGTGCC       |
| PT7sgRNAFP | Forward primer for sequencing sgRNAs cloned in pT7sgRNA                             | GGCCGATTCATTAATGCAGCT    |
| PT7sgRNARP | Reverse primer for sequencing sgRNAs cloned in pT7sgRNA                             | ACTGAGAGTGCACCATATGC     |
| G1FP       | Forward primer for respective amplicons for <i>in vitro</i> cleavage and T7E1 assay | TCTATCAGCGCTGCCTGTCT     |
| G1RP       | Reverse primer for respective amplicons for <i>in vitro</i> cleavage and T7E1 assay | CCACTGACATTCGAGCGAG      |
| G3RP       | Reverse primer for respective amplicons for <i>in vitro</i> cleavage and T7E1 assay | TGAGCGGCTATAACGTTGTC     |

|           |                                                                                     |                       |
|-----------|-------------------------------------------------------------------------------------|-----------------------|
| G4FP      | Forward primer for respective amplicons for <i>in vitro</i> cleavage and T7E1 assay | GCTCGCTCGAATGTCAGTG   |
| G4RP      | Reverse primer for respective amplicons for <i>in vitro</i> cleavage and T7E1 assay | GAGGCTGGTAATACTGTGGTG |
| ActinRTFP | Forward primer for quantitative reverse transcriptase PCR of <i>-actin</i>          | GAATCTCCCCCTCATGCTT   |
| ActinRTRP | Reverse primer for quantitative reverse transcriptase PCR of <i>-actin</i>          | GCCTGGGCTTCCGACACT    |
| PacCRTFP  | Forward primer for quantitative reverse transcriptase PCR of <i>pacC</i>            | TCCCAGCAGCCCCAAC      |
| PacCRTRP  | Reverse primer for quantitative reverse transcriptase PCR of <i>pacC</i>            | ATGTGGGAGGTGATGTGGT   |

(Nucleotides highlighted in yellow depicts overhangs for Bbs1 enzyme enabling cloning of these oligonucleotides in expression vectors used in this study).

**Table S2. List of amplicons and products for *in vitro* cleavage and T7E1.**

| PCR Amplicons | Region of <i>pacC</i> amplified | Primers used for in vitro cleavage/ T7E1 assay | Amplicon size | Size of cleaved fragments |
|---------------|---------------------------------|------------------------------------------------|---------------|---------------------------|
| G1            | -319 to 286                     | G1 FP + G1RP                                   | 727           | 425 + 302                 |
| G2            | -319 to 408                     | G1 FP + sgRNA3RP                               | 894           | 589 + 305                 |
| G3            | 267 to 945                      | sgRNA2FP + G3RP                                | 679           | 306 + 373                 |
| G4            | 389 to 1016                     | G4FP + G4RP                                    | 628           | 372 + 256                 |



**Table S3. Summary of CRISPR/Cas9-mediated editing of *pacC*.**

| Plasmid name | Protospacer and PAM sequence <sup>a</sup> | Number of analyzed transformants | Mitotically-stable transformants | Mutants detected by T7E1 | Mutations screened by Sequencing |
|--------------|-------------------------------------------|----------------------------------|----------------------------------|--------------------------|----------------------------------|
| psgRNA5_sg1  | GCAGCAACATCAGCA<br>TCAGC <b>AGG</b>       | 0                                | 0                                | 0                        | 0                                |
| psgRNA5_sg2  | CTCTGCACTGTCTGC<br>GAGGT <b>CGG</b>       | 20                               | 16                               | 0                        | 0                                |
| psgRNA5_sg3  | CATGTGTGCGAGCGC<br>CACGT <b>CGG</b>       | 20                               | 16                               | 5                        | 5 <sup>b</sup><br>(2 bp del)     |
| psgRNA5_sg4  | GAAGCATGTCAAGAC<br>GCACG <b>CGG</b>       | 20                               | 13                               | 4                        | 4 <sup>c</sup><br>(2 bp del)     |

a- PAM sequence (NGG) is shown in red. b- Sequencing identified a 2bp deletion in all the screened colonies. c - Sequencing identified a 2bp deletion in all the screened colonies.
